# Supplementary material
Source: Springer Nature journal article supplement (https://www.springermedizin.de/resource/supplementary/12889_2006_1021_MOESM5_ESM.pdf/9503152)
Supplement: MOESM5 [file 9503152]

**Week 01**

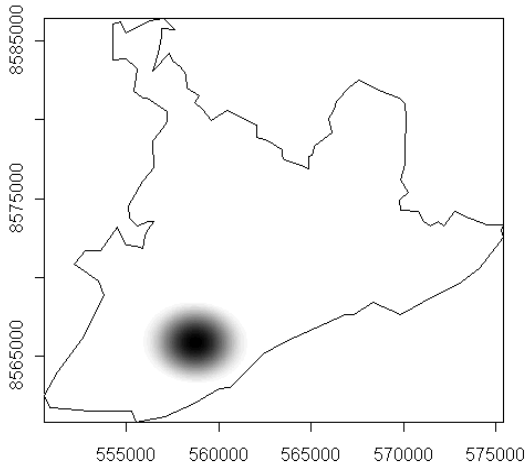

numbers of cases: 2

**Week 02**

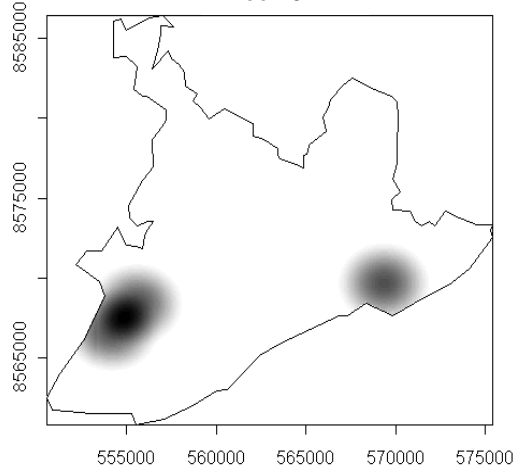

numbers of cases: 3

**Week 03**

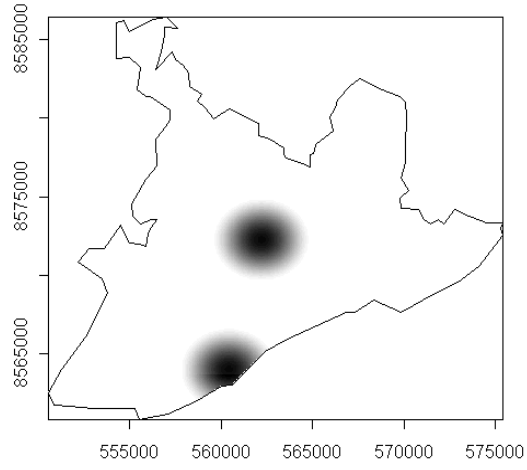

numbers of cases: 2

**Week 04**

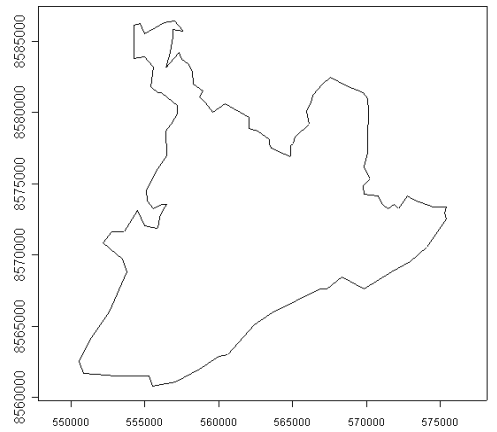

numbers of cases: 0

**Week 05**

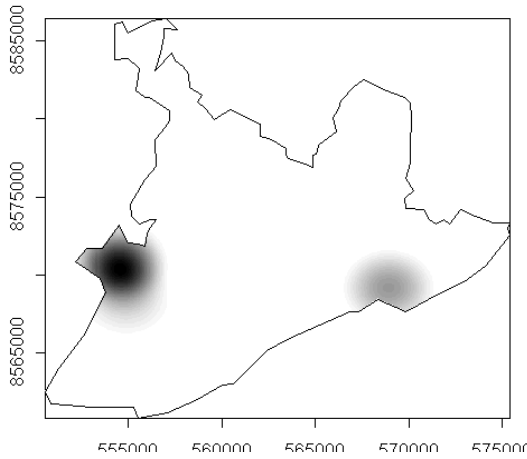

numbers of cases: 8

**Week 06**

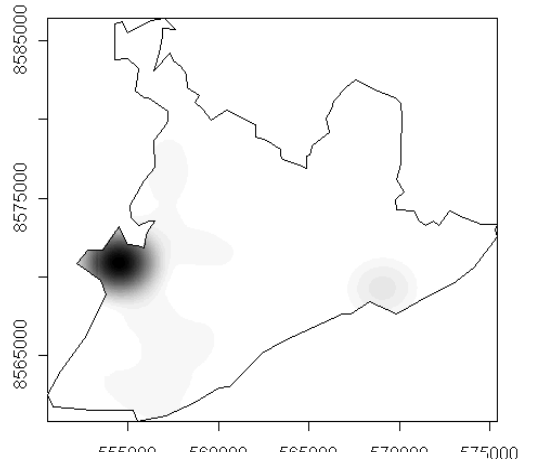

numbers of cases: 44
